# Supplementary material
Source: publisher site journal article supplement (https://www.dovepress.com/article/442971)

Supplemental Figure 1. Conjunctival Staining Score analyses. A, mean values at each time point by study group. B, least-squares mean changes from baseline at each time point by treatment group (linear mixed effects models). OD, right eye; OS, left eye; CsA, cyclosporine ophthalmic emulsion 0.05% (Restasis). Error bars are one standard deviation (A), or  $\pm$  least squares standard error (B).

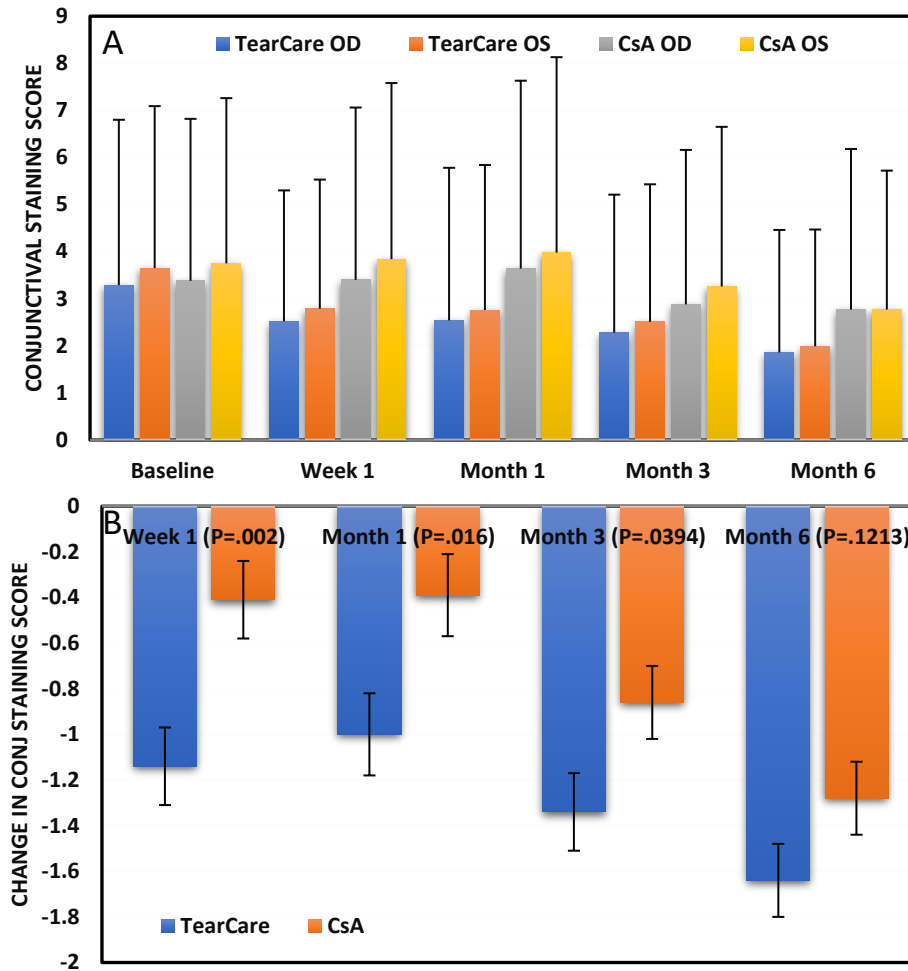

Supplemental Figure 2. Corneal Staining Score analyses. A, mean values at each time point by study group. B, least-squares mean changes from baseline at each time point by treatment group (linear mixed effects models). OD, right eye; OS, left eye; CsA, cyclosporine ophthalmic emulsion 0.05% (Restasis). Error bars are one standard deviation (A), or  $\pm$  least squares standard error (B).

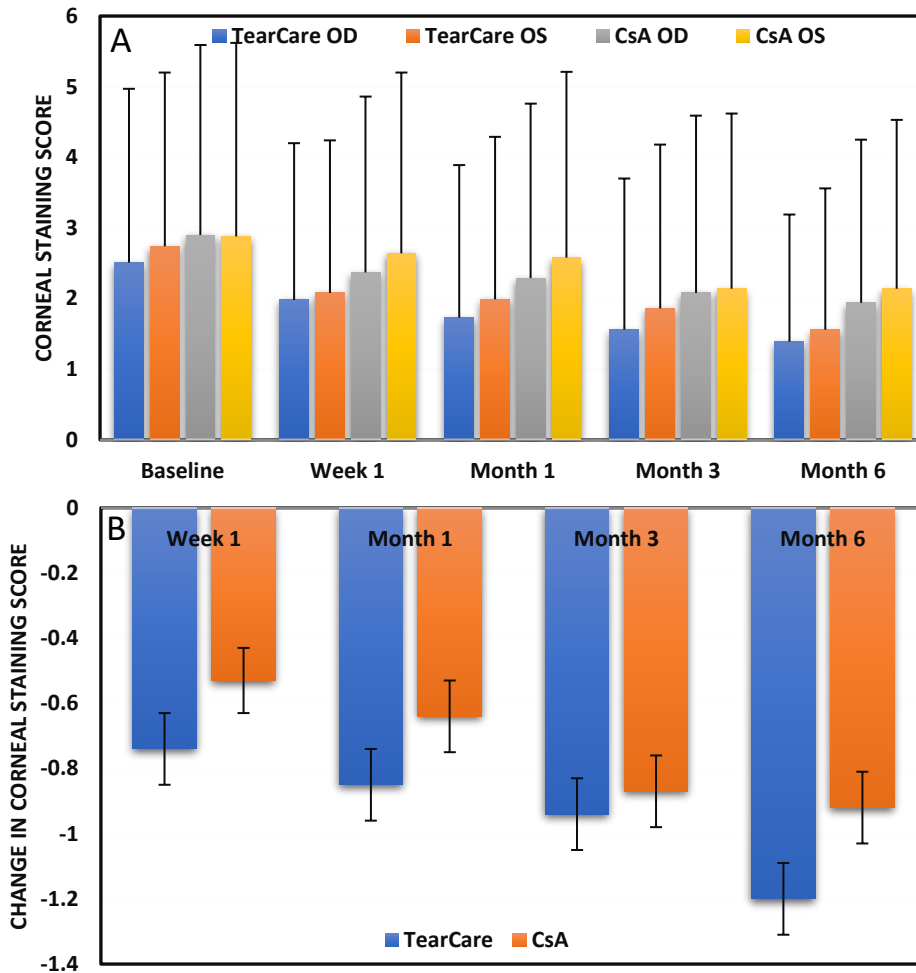

Supplemental Figure 3. SANDE Score analyses. A, mean values at each time point by study group. B, least-squares mean changes from baseline at each time point by treatment group (ANCOVA model). CsA, cyclosporine ophthalmic emulsion 0.05% (Restasis). Error bars are  $\pm$  one standard deviation (A), or  $\pm$  least squares standard error (B).

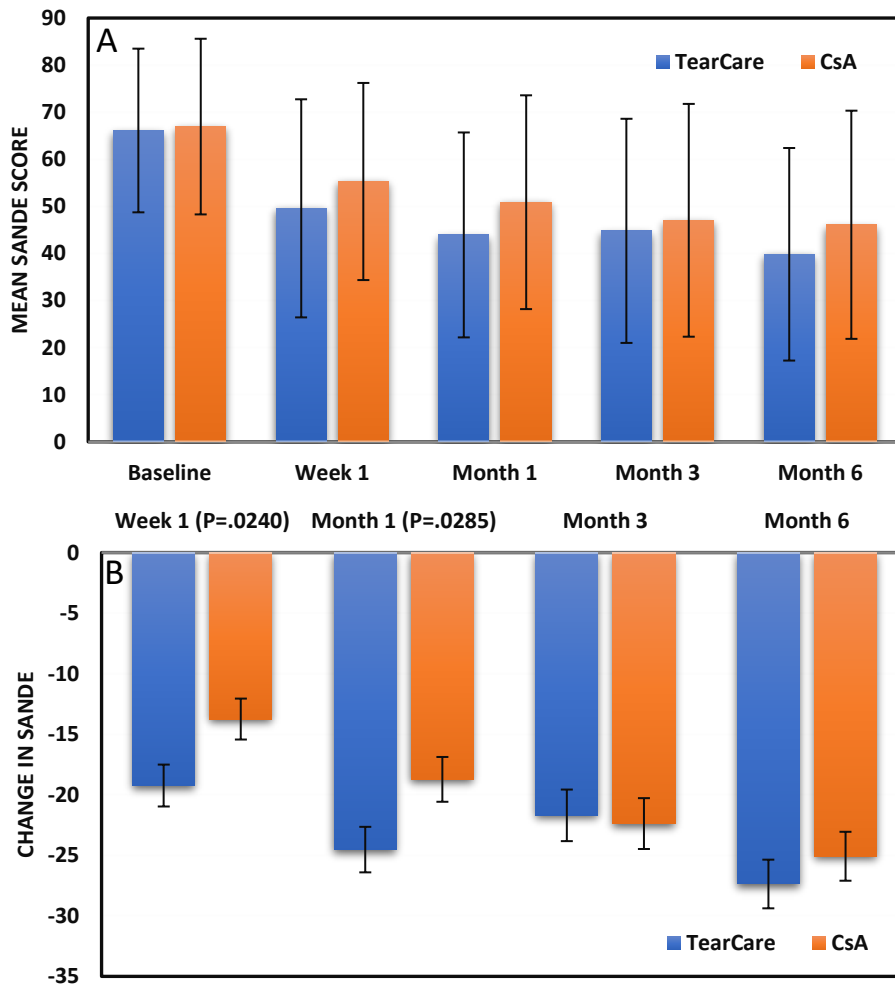

Supplemental Figure 4. Eye Dryness Score (EDS) analyses. A, mean values at each time point by study group. B, least-squares mean changes from baseline at each time point by treatment group (ANCOVA model). CsA, cyclosporine ophthalmic emulsion 0.05% (Restasis). Error bars are  $\pm$  one standard deviation (A), or  $\pm$  least squares standard error (B).

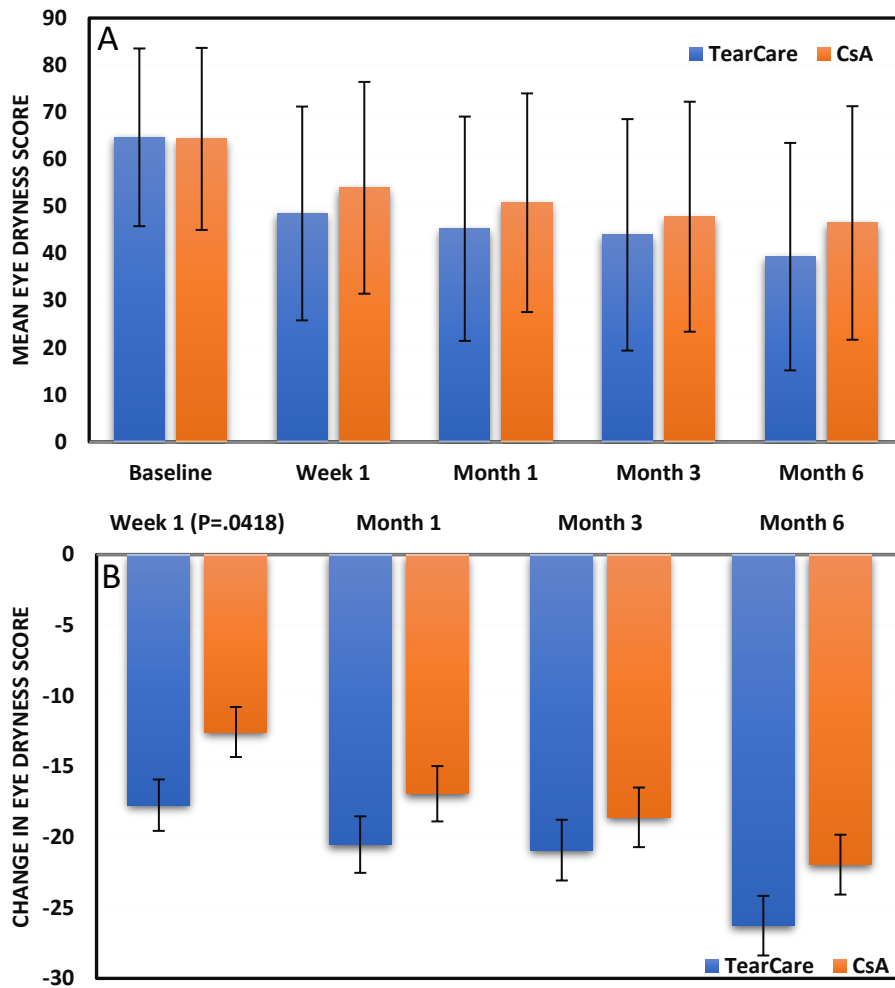

Supplemental Figure 5. Schirmer Tear Score (STS) analyses. A, mean values at each time point by study group. B, least-squares mean changes from baseline at each time point by treatment group (linear mixed effects models). OD, right eye; OS, left eye; CsA, cyclosporine ophthalmic emulsion 0.05% (Restasis). Error bars are  $\pm$  one standard deviation (A), or  $\pm$  least squares standard error (B).

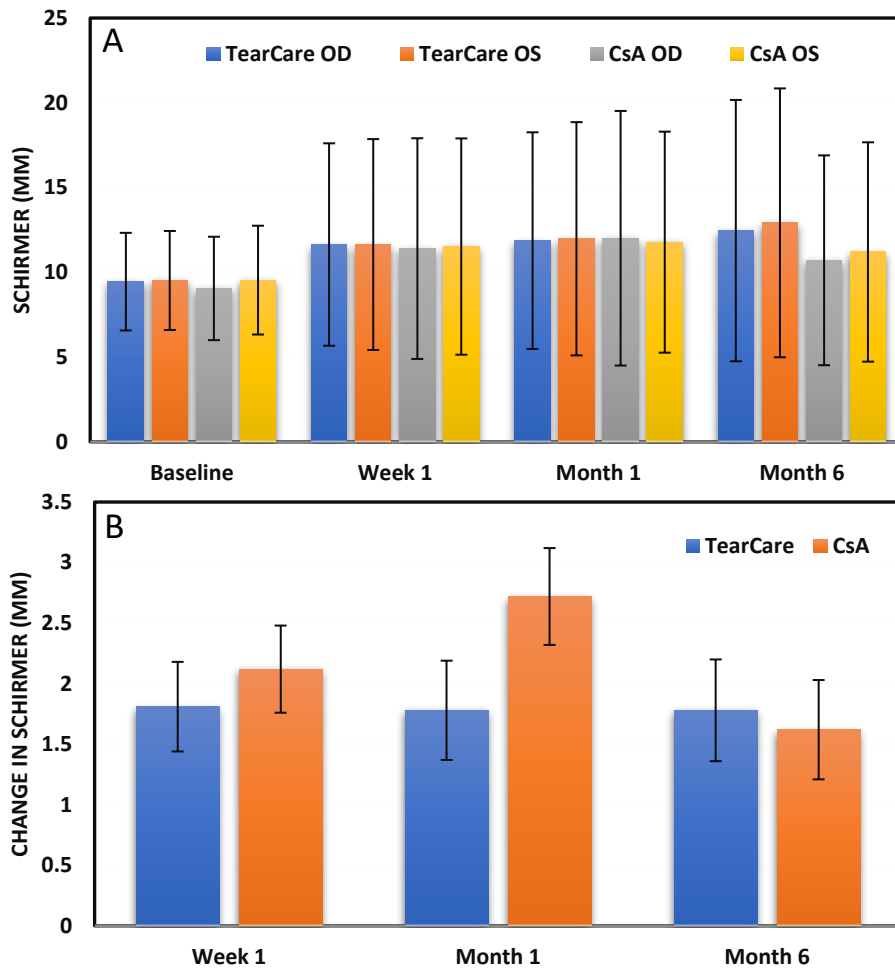

Supplement: Supplementary file 1 [file get_supplementary_file.php]
